# Supplementary material for: Predictive value of APAF-1 and COX-2 expression in pathologic complete response to neoadjuvant chemoradiotherapy for patients with locally advanced rectal adenocarcinoma
Source: PubMed Central journal article supplement (PMC5085224; doi:10.18632/oncotarget.9125), 2016-05-02
Supplement: oncotarget-07-35233-s001.pdf [file oncotarget-07-35233-s001.pdf]

## Predictive value of APAF-1 and COX-2 expression in pathologic complete response to neoadjuvant chemoradiotherapy for patients with locally advanced rectal adenocarcinoma

### SUPPLEMENTARY TABLES

Supplementary Table S1: The relationship between the status of pCR and clinicopathologic factors

| Clinical factor  | Number | pCR | no-pCR | <i>p</i> value |
|------------------|--------|-----|--------|----------------|
| Age (years)      |        |     |        | 0.806          |
| ≤56              | 41     | 12  | 29     |                |
| >56              | 41     | 11  | 30     |                |
| Gender           |        |     |        |                |
| Male             | 57     | 17  | 40     | 0.585          |
| Female           | 25     | 6   | 19     |                |
| Hb (g/L)         |        |     |        | 0.099          |
| ≤110             | 11     | 1   | 10     |                |
| >110             | 71     | 22  | 49     |                |
| CEA (ug/mL)      |        |     |        | 0.074          |
| <5.00            | 52     | 18  | 34     |                |
| ≥5.00            | 30     | 5   | 25     |                |
| Tumor location   |        |     |        | 0.586          |
| >5.0cm           | 46     | 14  | 32     |                |
| ≤5.0cm           | 36     | 9   | 27     |                |
| Clinical T stage |        |     |        | 0.888          |
| T1-2             | 4      | 1   | 3      |                |
| T3-4             | 78     | 22  | 56     |                |
| Clinical N stage |        |     |        | 0.100          |
| N0               | 16     | 2   | 14     |                |
| N+               | 66     | 21  | 45     |                |
| Histologic grade |        |     |        | 0.977          |
| G1-2             | 64     | 18  | 46     |                |
| G3               | 18     | 5   | 13     |                |

**Supplementary Table S2: The relationship between the expression level of APAF - 1 and the clinicopathologic factors**

| Clinical factor  | Number | Low expression | High expression | p value |
|------------------|--------|----------------|-----------------|---------|
| Age (years)      |        |                |                 | 0.182   |
| ≤56              | 41     | 15             | 26              |         |
| >56              | 41     | 21             | 20              |         |
| Gender           |        |                |                 |         |
| Male             | 57     | 22             | 35              | 0.144   |
| Female           | 25     | 14             | 11              |         |
| Hb (g/L)         |        |                |                 | 0.052   |
| ≤110             | 11     | 8              | 3               |         |
| >110             | 71     | 28             | 43              |         |
| CEA (ug/mL)      |        |                |                 | 0.316   |
| <5.00            | 52     | 25             | 27              |         |
| ≥5.00            | 30     | 11             | 19              |         |
| Tumor location   |        |                |                 | 0.075   |
| >5.0cm           | 46     | 16             | 30              |         |
| ≤5.0cm           | 36     | 20             | 16              |         |
| Clinical T stage |        |                |                 | 0.627   |
| T1-2             | 4      | 1              | 3               |         |
| T3-4             | 78     | 35             | 43              |         |
| Clinical N stage |        |                |                 | 0.026   |
| N0               | 16     | 11             | 5               |         |
| N+               | 66     | 25             | 41              |         |
| Histologic grade |        |                |                 | 0.958   |
| G1-2             | 64     | 28             | 36              |         |
| G3               | 18     | 8              | 10              |         |

**Supplementary Table S3: The relationship between the expression level of COX-2 and the clinicopathologic factors**

| Clinical factor  | Number | Low expression | High expression | p value |
|------------------|--------|----------------|-----------------|---------|
| Age (years)      |        |                |                 | 0.370   |
| ≤56              | 41     | 26             | 15              |         |
| >56              | 41     | 22             | 19              |         |
| Gender           |        |                |                 | 0.200   |
| Male             | 57     | 36             | 21              |         |
| Female           | 25     | 12             | 13              |         |
| Hb (g/L)         |        |                |                 | 1.000   |
| ≤110             | 11     | 7              | 4               |         |
| >110             | 71     | 41             | 30              |         |
| CEA (ug/mL)      |        |                |                 | 0.468   |
| <5.00            | 52     | 32             | 20              |         |
| ≥5.00            | 30     | 16             | 14              |         |
| Tumor location   |        |                |                 | 0.658   |
| >5.0cm           | 46     | 28             | 18              |         |
| ≤5.0cm           | 36     | 20             | 16              |         |
| Clinical T stage |        |                |                 | 1.000   |
| T1-2             | 4      | 2              | 2               |         |
| T3-4             | 78     | 46             | 42              |         |
| Clinical N stage |        |                |                 | 0.355   |
| N0               | 16     | 11             | 5               |         |
| N+               | 66     | 37             | 29              |         |
| Histologic grade |        |                |                 | 0.771   |
| G1-2             | 64     | 38             | 26              |         |
| G3               | 18     | 10             | 8               |         |
